# Supplementary material for: Cytokinin Production by the Rice Blast Fungus Is a Pivotal Requirement for Full Virulence
Source: PLOS journal article supplement (doi:10.1371/journal.ppat.1005457), 2016-02-22
Supplement: S1 (10.1371/journal.ppat.1005457.s001) [file journal.ppat.1005457.s001]

| Function               | Family                   | Number of genes in<br><i>A.thaliana</i> | Number of genes in<br><i>O.sativa</i> | Number of genes in<br><i>M.oryzae</i>                                                                                   | Number of gene in<br><i>S.cerevisiae</i> |
|------------------------|--------------------------|-----------------------------------------|---------------------------------------|-------------------------------------------------------------------------------------------------------------------------|------------------------------------------|
| Biosynthesis           | IPT                      | 7 <sup>1,2,3</sup>                      | 8 <sup>11,12</sup>                    | not found                                                                                                               | not found                                |
|                        | tRNA-IPT                 | 2 <sup>4,5</sup>                        | 2 <sup>11</sup>                       | 1 <sup>b</sup>                                                                                                          | 1 <sup>c</sup>                           |
|                        | LOG                      | 9 <sup>6</sup>                          | 11 <sup>11</sup>                      | 1 <sup>b</sup>                                                                                                          | 1 <sup>c</sup>                           |
|                        | CYP735A                  | 2 <sup>7</sup>                          | 2 <sup>11</sup>                       | difficult to identify                                                                                                   | 2 <sup>c</sup>                           |
|                        | AK                       | 2 <sup>8</sup> (3 TAIR)                 | 4 <sup>a</sup>                        | 1 <sup>b</sup>                                                                                                          | 1 <sup>c</sup>                           |
| Degradation            | CKX                      | 7 <sup>9</sup>                          | 11 <sup>11</sup>                      | a lot of enzymes with a putative oxidase activity were found but their role in CKs metabolism is still unclear in fungi |                                          |
| Transduction signaling | HKs and related proteins | 16 <sup>10</sup>                        | 14 <sup>13</sup>                      | 10 <sup>14, 15, 16</sup>                                                                                                | 1 <sup>18,c</sup>                        |
|                        | HPTs                     | 6 <sup>10</sup>                         | 5 <sup>13</sup>                       | 1 <sup>b</sup>                                                                                                          | 1 <sup>18, 19c</sup>                     |
|                        | RR-A                     | 11 <sup>10</sup>                        | 22 <sup>13</sup> ; 10 <sup>11</sup>   | 1 <sup>17, b</sup>                                                                                                      | 1 <sup>18, 20,c</sup>                    |
|                        | RR-B                     | 12 <sup>10</sup>                        | 7 <sup>13</sup> ; 13 <sup>11</sup>    | 1 <sup>17, b</sup>                                                                                                      | 1 <sup>20,c</sup>                        |

<sup>1</sup>Kakimoto, T. (2001) Identification of plant cytokinin biosynthetic enzymes as dimethylallyl diphosphate:ATP/ADP isopentenyltransferases. *Plant Cell Physiol.* 42, 677–685; <sup>2</sup>Kakimoto, T. (2003) Biosynthesis of cytokinins. *J. Plant Res.* 116, 233–239; <sup>3</sup>Takei, K. *et al.* (2001) Identification of Genes Encoding Adenylate Isopentenyltransferase, a Cytokinin Biosynthesis Enzyme, in Arabidopsis thaliana. *J. Biol. Chem.* 276, 26405–26410; <sup>4</sup>Golovko, A. *et al.* (2002) Identification of a tRNA isopentenyltransferase gene from Arabidopsis thaliana. *Plant Mol. Biol.* 49, 161–169; <sup>5</sup>Miyawaki, K. *et al.* (2006) Roles of Arabidopsis ATP/ADP isopentenyltransferases and tRNA isopentenyltransferases in cytokinin biosynthesis. *Proc. Natl. Acad. Sci.*; <sup>6</sup>Kuroha, T. *et al.* (2009) Functional analyses of LONELY GUY cytokinin-activating enzymes reveal the importance of the direct activation pathway in Arabidopsis. *Plant Cell* 21, 3152–3169.; <sup>7</sup>Takei, K. *et al.* (2004) Arabidopsis CYP735A1 and CYP735A2 encode cytokinin hydroxylases that catalyze the biosynthesis of trans-Zeatin. *J. Biol. Chem.* 279, 41866–41872; <sup>8</sup>Moffatt, B. a *et al.* (2000) Adenosine kinase of Arabidopsis. Kinetic properties and gene expression. *Plant Physiol.* 124, 1775–1785; <sup>9</sup>Schmülling, T. *et al.* (2003) Structure and function of cytokinin oxidase/dehydrogenase genes of maize, rice, Arabidopsis and other species. *J. Plant Res.* 116, 241–52; <sup>10</sup>Hwang, I. and Sheen, J. (2001) Two-component circuitry in Arabidopsis cytokinin signal transduction. *Nature* 413, 383–9; <sup>11</sup>Tsai, Y.-C. *et al.* (2012) Characterization of genes involved in cytokinin signaling and metabolism from rice. *Plant Physiol.* 158, 1666–84; <sup>12</sup>Sakamoto, T. *et al.* (2006) Ectopic expression of KNOTTED1-like homeobox protein induces expression of cytokinin biosynthesis genes in rice. *Plant Physiol.* 142, 54–62; <sup>13</sup>Pareek, A. *et al.* (2006) Whole-genome analysis of Oryza sativa reveals similar architecture of two-component signaling machinery with Arabidopsis. *Plant Physiol.* 142, 380–97; <sup>14</sup>Dean, R. a *et al.* (2005) The genome sequence of the rice blast fungus Magnaporthe grisea. *Nature* 434, 980–986; <sup>15</sup>Motoyama, T. *et al.* (2005) A two-component histidine kinase of the rice blast fungus is involved in osmotic stress response and fungicide action. *Fungal Genet. Biol.* 42, 200–212; <sup>16</sup>Zhang, H. *et al.* (2010) A two-component histidine kinase, MoSLN1, is required for cell wall integrity and pathogenicity of the rice blast fungus, Magnaporthe oryzae. *Curr. Genet.* 56, 517–528; <sup>17</sup>Motoyama, T. *et al.* (2008) Involvement of putative response regulator genes of the rice blast fungus Magnaporthe oryzae in osmotic stress response, fungicide action, and pathogenicity. *Current Genetics.* 54, 185-195; <sup>18</sup>Posas, F. *et al.* (1996) Yeast HOG1 MAP kinase cascade is regulated by a multistep phosphorelay mechanism in the SLN1-YPD1-SSK1 “two-component” osmosensor. *Cell* 86, 865–875; <sup>19</sup>Xu, Q. and West, a H. (1999) Conservation of structure and function among histidine-containing phosphotransfer (HPT) domains as revealed by the crystal structure of YPD1. *J. Mol. Biol.* 292, 1039–1050; <sup>20</sup>Li, S. *et al.* (1998) The yeast histidine protein kinase, Sln1p, mediates phosphotransfer to two response regulators, Ssk1p and Skn7p. *EMBO J.* 17, 6952–6962
